# Supplementary material for: Topical Delivery of Diacetyl Boldine in a Microemulsion Formulation for Chemoprotection against Melanoma
Source: MDPI journal article supplement (doi:10.3390/pharmaceutics15030901), 2023-03-10

## Supplementary Materials

**Table S1.** Mathematical models for *in vitro* release of microemulsion formulations of MCT-DAB, F1 and F2. R<sup>2</sup> values for the fitted release results for various mathematical models.

| Formulation | Zero-order<br>(r <sup>2</sup> ) | First-order<br>(r <sup>2</sup> ) | Higuchi (r <sup>2</sup> ) | Hixson<br>Crowell (r <sup>2</sup> ) | Korsmeyer<br>Peppas (r <sup>2</sup> ) |
|-------------|---------------------------------|----------------------------------|---------------------------|-------------------------------------|---------------------------------------|
| MCT-DAB     | 0.9387                          | 0.8105                           | 0.9926                    | 0.8605                              | 0.9885                                |
| F1          | 0.9617                          | 0.8230                           | 0.9967                    | 0.8795                              | 0.9907                                |
| F2          | 0.9904                          | 0.8789                           | 0.9971                    | 0.9327                              | 0.9961                                |

**Figure S1:**

Particle size distribution curves for various formulations. a = ME1; b = ME2; c = F1; d = F2

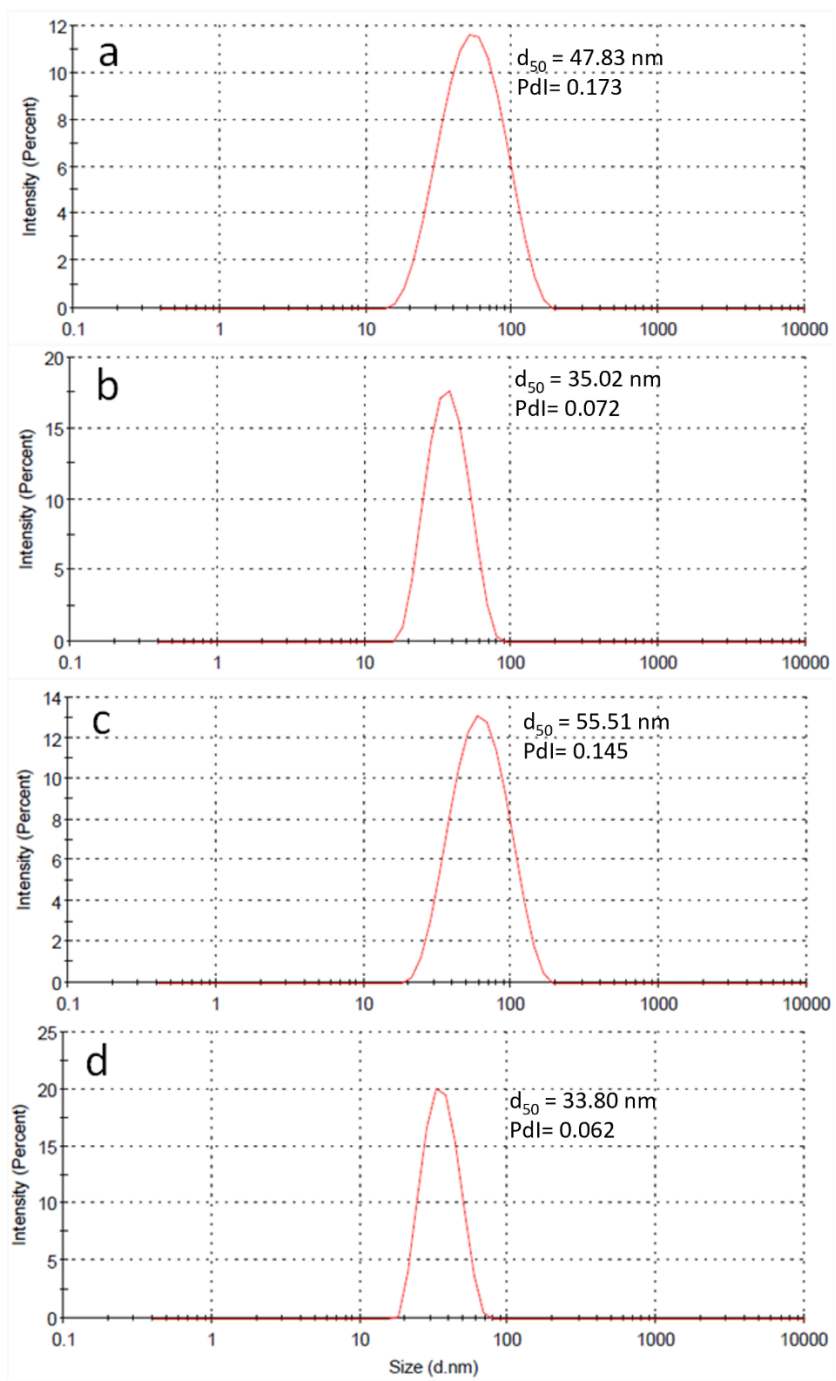

Supplement: s1 [file s1]
